# Supplementary material for: Reveal the correlation between hub hypoxia/immune-related genes and immunity and diagnosis, and the effect of SAP30 on cell apoptosis, ROS and MDA production in cerebral ischemic stroke
Source: publisher site journal article supplement (doi:10.18632/aging.205339), 2023-12-27
Supplement: Supplementary file [file aging-v15i24-205339-supplementary-material-SD1.pdf]

## SUPPLEMENTARY FIGURES

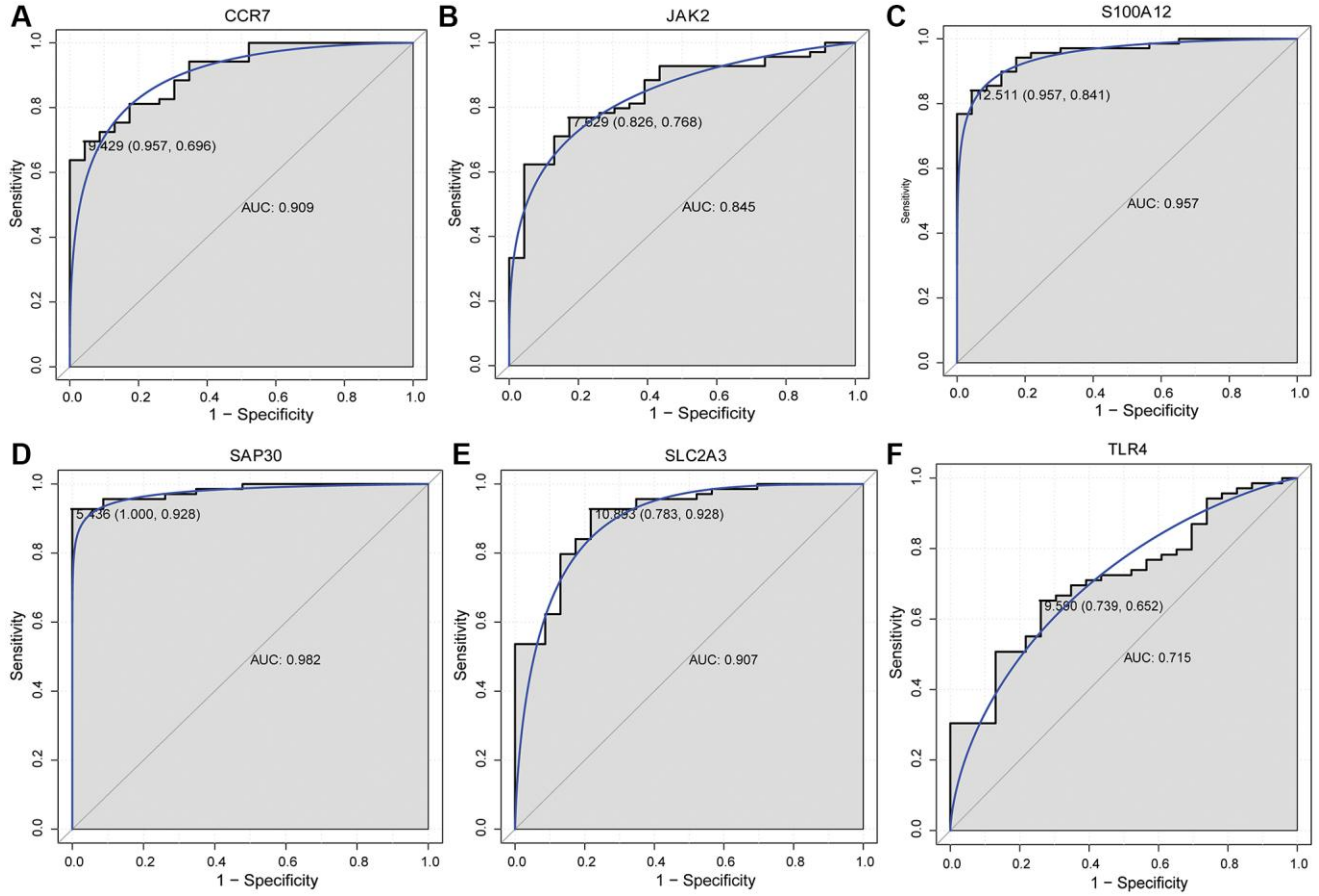

**Supplementary Figure 1.** The ROC curves of CCR7 (A), JAK2 (B), S100A12 (C), SAP30 (D), SLC2A3 (E) and TLR4 (F) in the GSE58294 dataset.

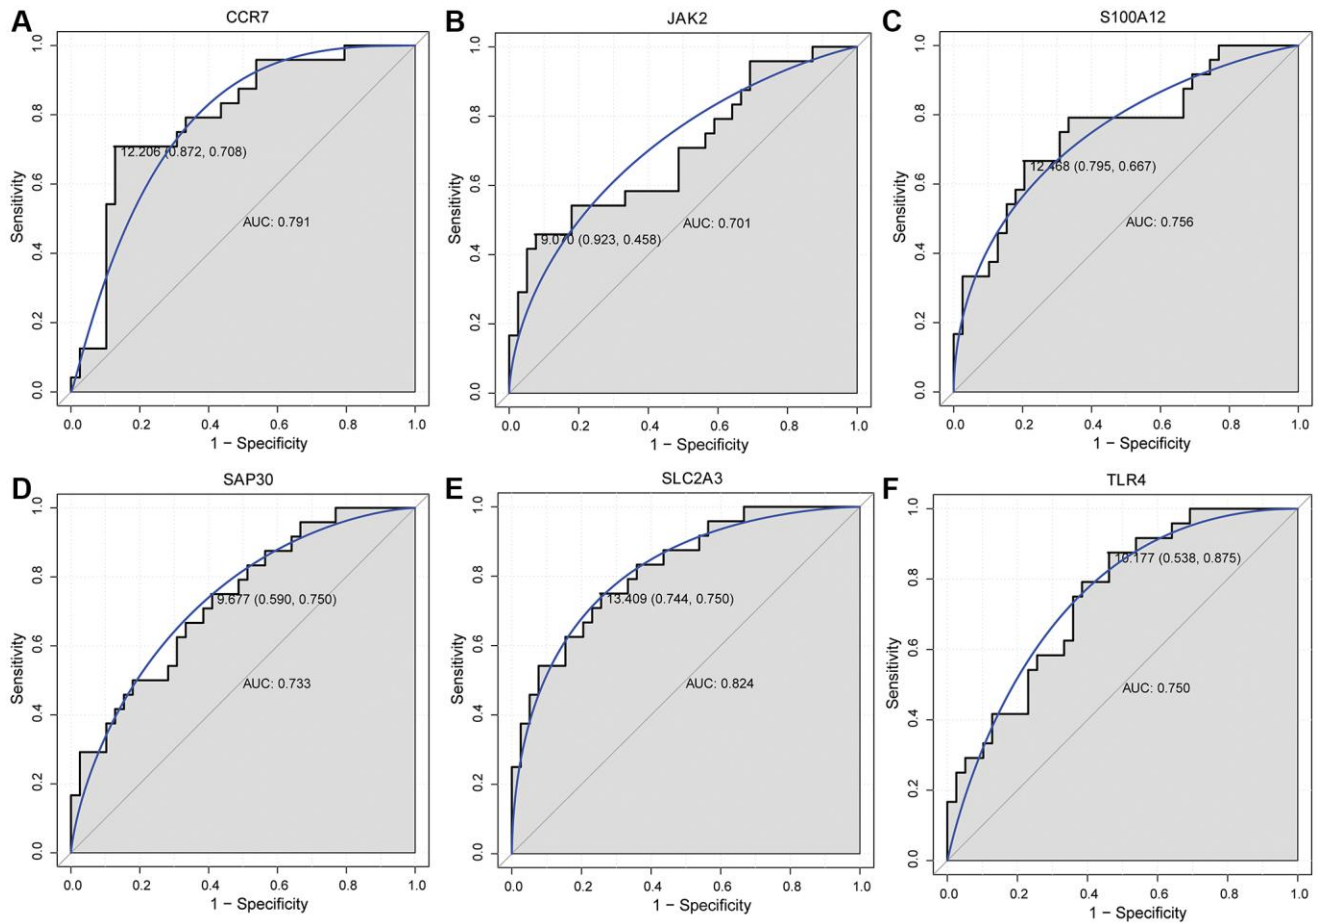

**Supplementary Figure 2.** The ROC curves of CCR7 (A), JAK2 (B), S100A12 (C), SAP30 (D), SLC2A3 (E) and TLR4 (F) in the GSE16561 dataset.

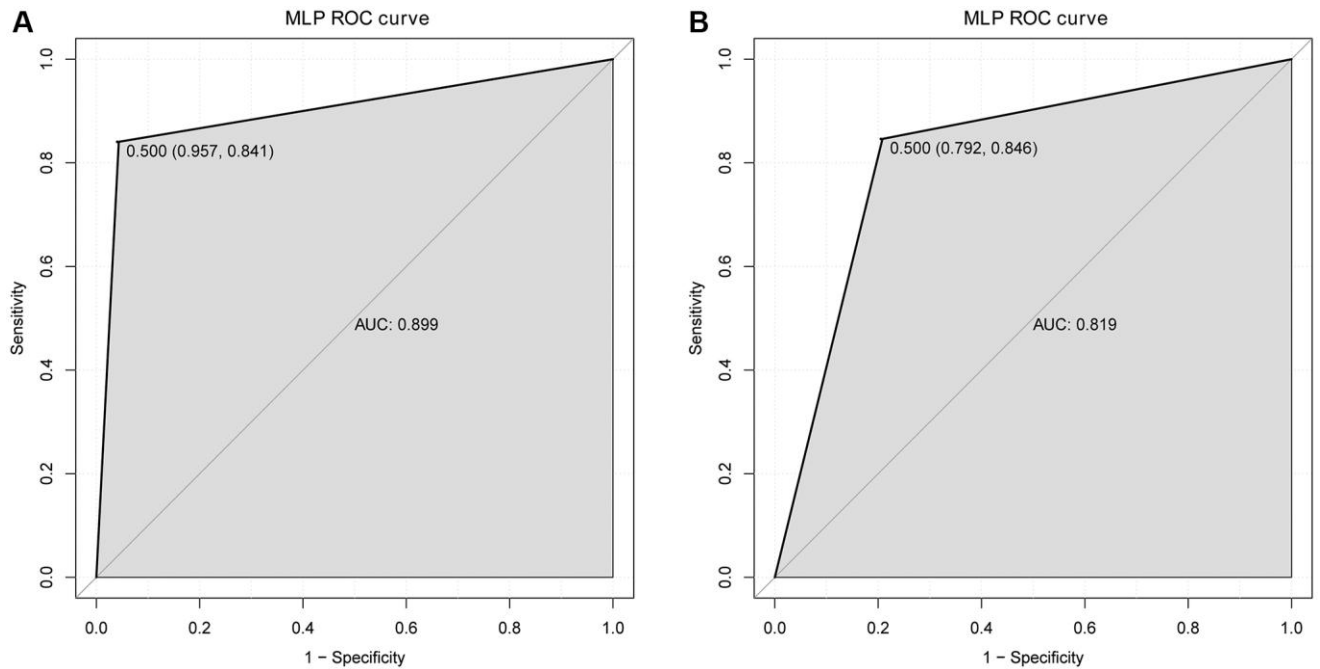

**Supplementary Figure 3.** The ROC curves of MLP classification model in GSE58294 (A) and GSE16561 (B) datasets.
